# Supplementary material for: Born Not Made: The Impact of Six Entrepreneurial Personality Dimensions on Entrepreneurial Intention: Evidence from Healthcare Higher Education Students
Source: MDPI journal article supplement (doi:10.3390/su15032266), 2023-01-26
Supplement: s1 [file s1]

Archive with 1 entries (1 files):
- sustainability-2123560-supplementary.pdf
