# Supplementary material for: Born Not Made: The Impact of Six Entrepreneurial Personality Dimensions on Entrepreneurial Intention: Evidence from Healthcare Higher Education Students
Source: MDPI journal article supplement (doi:10.3390/su15032266), 2023-01-26
Supplement: s1 [file s1 › sustainability-2123560-supplementary.pdf]

# Born not Made, The Impact of Six Entrepreneurial Personality Dimensions on Entrepreneurship Intention: Evidence from Healthcare Higher Education Students.

Maged E Mohamed<sup>1,2,3,\*</sup>, Ibrahim Abdelhamid Elshaer<sup>1,4,5</sup>, Alaa Mohamed Azzaz<sup>1,6,7</sup> and Nancy S Younis<sup>1,2,8</sup>

- <sup>1</sup> The Saudi Investment Bank Scholarly Chair for Investment Awareness Studies, The Deanship of Scientific Research, The Vice Presidency for Graduate Studies and Scientific Research, King Faisal University, Al-Ahsaa 31982, Saudi Arabia.
- <sup>2</sup> Department of Pharmaceutical Sciences, College of Clinical Pharmacy, King Faisal University, Al-Ahsaa, Saudi Arabia. Memohamed@kfu.edu.sa (M.E.M), nyounis@kfu.edu.sa (N.S.Y).
- <sup>3</sup> Department of Pharmacognosy, College of Pharmacy, Zagazig University, Zagazig, Egypt.
- <sup>4</sup> Department of Management, College of Business Administration, King Faisal University, 380 Al-Ahsaa, Saudi Arabia; ielshaer@kfu.edu.sa (I.A.E.).
- <sup>5</sup> Hotel Studies Department, Faculty of Tourism and Hotels, Suez Canal University, 41522 Ismailia, Egypt.
- <sup>6</sup> Department of Tourism and Hospitality, Arts College, King Faisal University, 380 Al-Ahsaa, Saudi Arabia; aazazz@kfu.edu.sa (A.M.S.A.)
- <sup>7</sup> Tourism Studies Department, Faculty of Tourism and Hotels, Suez Canal University, 41522, Ismailia, Egypt.
- <sup>8</sup> Zagazig University Hospitals, Zagazig University, Zagazig, Egypt.
- \* Correspondence: Maged E Mohamed; Memohamed@kfu.edu.sa (M.E.M).

## Survey questions

### **Section One: Respondent Profile**

*Please fill in the blank or tick in the appropriate response*

**1. Age**

- 1 :17- 20 years,
- 2: 20-29 years
- 3 : Above 29 years

**2. Gender**

- 1 : Male
- 2: Female

**3. College**

- 1 : Medicine
- 2 : Clinical pharmacy
- 3: Applied medical science
- 4 : Dentistry

**4. Do you have any other professional qualifications? (please specify):\_\_\_\_\_**

### **Section Two:**

The questions in this section of the questionnaire are concerned with **entrepreneurship intention**

| Please circle the one number for each question that comes closest to reflecting your opinion where one means completely Disagree and 7 means completely agree |                                                                                                |               |
|---------------------------------------------------------------------------------------------------------------------------------------------------------------|------------------------------------------------------------------------------------------------|---------------|
| 1                                                                                                                                                             | Having intention to start a self-owned business in 2 years                                     | 1 2 3 4 5 6 7 |
| 2                                                                                                                                                             | Having intention to start a self-owned business to provide radical innovation.                 | 1 2 3 4 5 6 7 |
| 3                                                                                                                                                             | Having intention to start a self-owned business to introduce a new variant of existing service | 1 2 3 4 5 6 7 |

### **Section Three:**

The questions in this section of the questionnaire are concerned with **entrepreneurship Traits**

| Please circle the one number for each question that comes closest to reflecting your opinion where one means completely Disagree and 7 means completely agree |                                    |             |
|---------------------------------------------------------------------------------------------------------------------------------------------------------------|------------------------------------|-------------|
| Internal locus of control (6-items):                                                                                                                          |                                    |             |
| 1                                                                                                                                                             | Belief in success due to luck (-). | 1 2 3 4 5 6 |

|                                  |                                                           |   |   |   |   |   |   |
|----------------------------------|-----------------------------------------------------------|---|---|---|---|---|---|
| 2                                | Belief in being controlled by accidental happenings (-).  | 1 | 2 | 3 | 4 | 5 | 6 |
| 3                                | Belief in gaining achievements due to luck (-).           | 1 | 2 | 3 | 4 | 5 | 6 |
| 4                                | Belief in actions will determine the life.                | 1 | 2 | 3 | 4 | 5 | 6 |
| 5                                | Belief in being successful due to hard work               | 1 | 2 | 3 | 4 | 5 | 6 |
| 6                                | Belief in being able to control my life                   | 1 | 2 | 3 | 4 | 5 | 6 |
| <b>Innovativeness (3-items)</b>  |                                                           |   |   |   |   |   |   |
| 1                                | Have novel ideas.                                         | 1 | 2 | 3 | 4 | 5 | 6 |
| 2                                | Participation in creative activities                      | 1 | 2 | 3 | 4 | 5 | 6 |
| 3                                | Not being creative (-)                                    | 1 | 2 | 3 | 4 | 5 | 6 |
| <b>Autonomy (5-items)</b>        |                                                           |   |   |   |   |   |   |
| 1                                | Preference of making decision by myself.                  | 1 | 2 | 3 | 4 | 5 | 6 |
| 2                                | Ability to regulate my time.                              | 1 | 2 | 3 | 4 | 5 | 6 |
| 3                                | Preference to be his/ her boss.                           | 1 | 2 | 3 | 4 | 5 | 6 |
| 4                                | Preference of not obeying organizational rules.           | 1 | 2 | 3 | 4 | 5 | 6 |
| 5                                | Tendency to work independently                            | 1 | 2 | 3 | 4 | 5 | 6 |
| <b>Risk-taking (3-items)</b>     |                                                           |   |   |   |   |   |   |
| 1                                | propensity Not willing to take risk in choosing job (-)   | 1 | 2 | 3 | 4 | 5 | 6 |
| 2                                | Preference to have a secure job (-)                       | 1 | 2 | 3 | 4 | 5 | 6 |
| 3                                | Preference not to work in new place                       | 1 | 2 | 3 | 4 | 5 | 6 |
| <b>Pro activeness (5-items)</b>  |                                                           |   |   |   |   |   |   |
| 1                                | Belief in I will fix if I do not like                     | 1 | 2 | 3 | 4 | 5 | 6 |
| 2                                | Belief in being able to make possible.                    | 1 | 2 | 3 | 4 | 5 | 6 |
| 3                                | Excel at identifying opportunities.                       | 1 | 2 | 3 | 4 | 5 | 6 |
| 4                                | Looking for better ways                                   | 1 | 2 | 3 | 4 | 5 | 6 |
| 5                                | Belief in nothing can stop me from my idea                | 1 | 2 | 3 | 4 | 5 | 6 |
| <b>Problem solving (6-items)</b> |                                                           |   |   |   |   |   |   |
| 1                                | Tendency to enjoy tackling new problems                   | 1 | 2 | 3 | 4 | 5 | 6 |
| 2                                | Tendency to enjoy solving complex problems                | 1 | 2 | 3 | 4 | 5 | 6 |
| 3                                | Tendency to enjoy more by solving more difficult problems | 1 | 2 | 3 | 4 | 5 | 6 |
| 4                                | Being successful in solving problems.                     | 1 | 2 | 3 | 4 | 5 | 6 |
| 5                                | Being able to solve problem systematically                | 1 | 2 | 3 | 4 | 5 | 6 |
| 6                                | Being able to act decisively in problem solving           | 1 | 2 | 3 | 4 | 5 | 6 |

Please, if you want to comment on any particular question or if there is any issue /factor/ aspect that you feel it would be of interest to this research; please feel free to add it in the next part.

---



---



---



---



---
